# Supplementary material for: Heterogeneity and district-level factors associated with COVID-19 mortality during three epidemic waves in Indonesia: a nationwide ecological study
Source: bioRxiv or medRxiv preprint supplement (doi:10.1101/2022.06.20.22276672), 2022-06-22
Supplement: Supplementary file [file media-1.pdf]

**Heterogeneity and district-level factors associated with COVID-19 mortality during three pandemic waves in Indonesia: a nationwide ecological study**

**Supplementary data**

**Supplementary Table 1. COVID-19 incidence rate between March 2020 and February 2022 in Indonesia by sex and province**

| Province                | Male         |                   |                | Female       |                   |                | Male-female Incidence rate ratio |
|-------------------------|--------------|-------------------|----------------|--------------|-------------------|----------------|----------------------------------|
|                         | No. of cases | No. of population | Incidence rate | No. of cases | No. of Population | Incidence rate |                                  |
| Aceh                    | 19,279       | 2,691,800         | 716.21         | 20,991       | 2,696,300         | 778.51         | 0.92                             |
| Bali                    | 76,221       | 2,221,400         | 3431.22        | 75,737       | 2,193,100         | 3453.42        | 0.99                             |
| Banten                  | 131,076      | 6,557,900         | 1998.75        | 133,673      | 12,895,300        | 1036.60        | 1.93                             |
| Bengkulu                | 12,046       | 1,015,200         | 1186.56        | 14,385       | 1,994,300         | 721.31         | 1.65                             |
| Yogyakarta              | 89,381       | 1,935,400         | 4618.22        | 100,757      | 3,919,200         | 2570.86        | 1.80                             |
| Jakarta                 | 567,947      | 5,267,800         | 10781.48       | 588,849      | 10,576,400        | 5567.58        | 1.94                             |
| Gorontalo               | 6112         | 593,500           | 1029.82        | 6738         | 1,186,300         | 567.98         | 1.81                             |
| Jambi                   | 15,330       | 1,831,300         | 837.11         | 16,917       | 3,604,200         | 469.37         | 1.78                             |
| West Java               | 480,932      | 25,111,200        | 1915.21        | 508,967      | 49,565,200        | 1026.86        | 1.87                             |
| Central Java            | 259,451      | 17,237,300        | 1505.17        | 294,624      | 34,738,200        | 848.13         | 1.77                             |
| East Java               | 252,742      | 19,722,200        | 1281.51        | 274,625      | 39,955,900        | 687.32         | 1.86                             |
| West Kalimantan         | 25,549       | 2,591,400         | 985.91         | 27,000       | 5,104,900         | 528.90         | 1.86                             |
| South Kalimantan        | 41,090       | 2,156,700         | 1905.23        | 40,388       | 4,268,600         | 946.17         | 2.01                             |
| Central Kalimantan      | 25,767       | 1,394,900         | 1847.23        | 26,179       | 2,686,300         | 974.54         | 1.90                             |
| East Kalimantan         | 104,211      | 1,902,900         | 5476.43        | 82,868       | 3,664,700         | 2261.25        | 2.42                             |
| North Kalimantan        | 20,546       | 374,100           | 5492.11        | 17,896       | 708,400           | 2526.25        | 2.17                             |
| Bangka Belitung Islands | 27,093       | 756,900           | 3579.47        | 31,381       | 1,469,800         | 2135.05        | 1.68                             |
| Riau Islands            | 33,042       | 1,179,000         | 2802.55        | 30,594       | 2,309,500         | 1324.70        | 2.12                             |
| Lampung                 | 28,001       | 4,364,300         | 641.59         | 36,645       | 8,534,800         | 429.36         | 1.49                             |
| Maluku                  | 8,915        | 900,400           | 990.12         | 9,335        | 1,787,100         | 522.35         | 1.90                             |
| North Maluku            | 6,740        | 637,300           | 1057.59        | 6,519        | 1,252,300         | 520.56         | 2.03                             |
| West Nusa Tenggara      | 17,385       | 2,563,900         | 678.07         | 17,731       | 5,225,900         | 339.29         | 2.00                             |
| East Nusa Tenggara      | 34,252       | 2,731,600         | 1253.92        | 39,283       | 5,513,400         | 712.50         | 1.76                             |
| Papua                   | 23,136       | 1,777,700         | 1301.46        | 20,842       | 3,393,100         | 614.25         | 2.12                             |
| West Papua              | 15,299       | 518,100           | 2952.91        | 13,751       | 986,000           | 1394.63        | 2.12                             |
| Riau                    | 69,698       | 3,553,200         | 1961.56        | 71,452       | 6,951,200         | 1027.91        | 1.91                             |
| West Sulawesi           | 6,151        | 692,200           | 888.62         | 7,567        | 1,378,100         | 549.09         | 1.62                             |

|                    |        |           |         |        |            |         |      |
|--------------------|--------|-----------|---------|--------|------------|---------|------|
| South Sulawesi     | 60,796 | 4,348,500 | 1398.09 | 73,206 | 8,888,800  | 823.58  | 1.70 |
| Central Sulawesi   | 23,262 | 1,565,100 | 1486.30 | 29,149 | 3,081,700  | 945.87  | 1.57 |
| Southeast Sulawesi | 11,861 | 1,352,900 | 876.71  | 12,598 | 2,703,500  | 465.99  | 1.88 |
| North Sulawesi     | 22,933 | 1,279,600 | 1792.20 | 25,371 | 2,512,900  | 1009.63 | 1.78 |
| West Sumatera      | 42,875 | 2,760,600 | 1553.10 | 54,651 | 5,545,700  | 985.47  | 1.58 |
| South Sumatera     | 36,933 | 4,358,000 | 847.48  | 39,159 | 8,600,800  | 455.29  | 1.86 |
| North Sumatera     | 64,778 | 7,392,700 | 876.24  | 74,593 | 14,798,400 | 504.06  | 1.74 |

**Supplementary Table 2. Correlation matrix between each district-level variable assessed in this study**

|                   | Mortality rate | Incidence rate | Elder population | Hypertension | Diabetes mellitus | Obesity | Pneumonia | Vaccine coverage | Doctor ratio | Nurse ratio | Midwife ratio | Hospital ratio | Expenditure | Life expectancy | Education |
|-------------------|----------------|----------------|------------------|--------------|-------------------|---------|-----------|------------------|--------------|-------------|---------------|----------------|-------------|-----------------|-----------|
| Mortality rate    |                |                |                  |              |                   |         |           |                  |              |             |               |                |             |                 |           |
| Incidence rate    | 0.0000         |                |                  |              |                   |         |           |                  |              |             |               |                |             |                 |           |
| Elder population  | 0.0000         | 0.0169         |                  |              |                   |         |           |                  |              |             |               |                |             |                 |           |
| Hypertension      | 0.0000         | 0.0000         | 0.0000           |              |                   |         |           |                  |              |             |               |                |             |                 |           |
| Diabetes mellitus | 0.0000         | 0.0000         | 0.0000           | 0.0007       |                   |         |           |                  |              |             |               |                |             |                 |           |
| Obesity           | 0.0000         | 0.0000         | 0.0307           | 0.8458       | 0.0000            |         |           |                  |              |             |               |                |             |                 |           |
| Pneumonia         | 0.0316         | 0.0179         | 0.0001           | 0.8889       | 0.2477            | 0.2400  |           |                  |              |             |               |                |             |                 |           |
| Vaccine coverage  | 0.0000         | 0.0000         | 0.0000           | 0.0000       | 0.0000            | 0.0000  | 0.0000    |                  |              |             |               |                |             |                 |           |
| Doctor ratio      | 0.0147         | 0.0000         | 0.0019           | 0.0007       | 0.0010            | 0.0010  | 0.5070    | 0.4155           |              |             |               |                |             |                 |           |
| Nurse ratio       | 0.7569         | 0.0000         | 0.0000           | 0.0001       | 0.6374            | 0.0255  | 0.1832    | 0.0003           | 0.0000       |             |               |                |             |                 |           |
| Midwife ratio     | 0.0000         | 0.0000         | 0.4821           | 0.6588       | 0.2270            | 0.3261  | 0.1593    | 0.0000           | 0.0000       | 0.0005      |               |                |             |                 |           |
| Hospital ratio    | 0.0000         | 0.0000         | 0.3757           | 0.0342       | 0.0000            | 0.0000  | 0.5500    | 0.0000           | 0.0000       | 0.0000      | 0.0000        |                |             |                 |           |
| Expenditure       | 0.0000         | 0.0000         | 0.0007           | 0.0010       | 0.0000            | 0.0000  | 0.0027    | 0.0000           | 0.0045       | 0.8661      | 0.1863        | 0.0000         |             |                 |           |
| Life expectancy   | 0.0000         | 0.0000         | 0.0000           | 0.0000       | 0.0000            | 0.0000  | 0.2332    | 0.0000           | 0.2701       | 0.0003      | 0.0032        | 0.0000         | 0.0000      |                 |           |
| Education         | 0.0000         | 0.0000         | 0.0384           | 0.0020       | 0.0000            | 0.0000  | 0.7313    | 0.0000           | 0.0000       | 0.0000      | 0.0002        | 0.0000         | 0.0000      | 0.0000          |           |
